# Supplementary material for: Simulations of Black Carbon Over Indian Region: Improvements and Implications of Diurnality in Emissions
Source: Copernicus journal article supplement (doi:10.5194/acp-2019-152), 2019-02-26
Supplement: Supplementary file [file acp-2019-152-AC2-supplement.pdf]

Interactive comment on “Simulations of Black Carbon Over Indian Region: Improvements and Implications of Diurnality in Emissions” by Gaurav Govardhan et al.

We highly appreciate and thank the summary evaluation of the reviewer and the positive recommendation.

The comments from referee are written in red colored text, while the author responses are written in black colored text.

Anonymous Referee #2

Please correct figure 2 caption to include the description of the black, blue and red lines used in the figure.

- We accept. The caption is corrected accordingly in the modified version of the manuscript.
